# Supplementary material for: Worldwide distribution of the DCDC2 READ1 regulatory element and its relationship with phoneme variation across languages
Source: PubMed Central journal article supplement — Proc Natl Acad Sci U S A. 2018 Apr 16;115(19):4951–6. doi: 10.1073/pnas.1710472115 (PMC5948951; doi:10.1073/pnas.1710472115), 2018-04-16
Supplement: pnas.1710472115.sapp.pdf [file pnas.1710472115.sapp.pdf]

## **SUPPLEMENTARY INFORMATION**

### **Methods**

#### **Bootstrap and Jackknife Sensitivity analyses**

We performed resampling tests to evaluate the robustness of our results in both the MANCOVA and linear mixed effects models for associations between phonemes and RU1-1 frequencies among the 43 populations we studied (Table S5). Confidence intervals for parameter estimates in the linear mixed effects model were generated through 10,000 bootstraps with the *bootMer* function in the R package *lme4* (1).

To quantify the sensitivity of the results to individual populations and population grouping by region, we performed leave-one out and leave-n out jackknifing, respectively, under both the MANCOVA and linear mixed effects models. Leave-one out jackknife tests entailed excluding a single population, among the 43 in our sample, and fitting both the MANCOVA and linear mixed effects models over the remaining 42 populations. Similarly, we assessed sensitivity of our results to regional differences through leave-n out jackknife tests, where a jackknife sample was formed by excluding *n* populations from four regional groupings of the populations in Africa, Europe, Asia, and the Americas, respectively.

#### **Migratory distances**

We modeled migratory distances between populations and the putative location of human origin using an undirected acyclic graph with nodes corresponding to the respective 43 populations in our sample (Figure S5). Six hub nodes were also instantiated for five migratory waypoints defined by Ramachandran, et al., (2007) (2),

located in Cairo (30N, 31E), Istanbul (41N, 29E), Phnom Penh (12N, 105E), Anadyr (64N, 177E), and Prince Rupert Island (54N, 130W), as well as at one putative location of human origin in South Africa (22S, 20E) proposed by Henn, et al. (2011) (3). Edges were also drawn connecting South Africa to Cairo, Cairo to Istanbul, Cairo to Phnom Penh, Cairo to Anadyr, and Anadyr to Prince Rupert Island. Each of the 43 populations were then connected to the hub node where their migration passed through most recently. Each edge was weighted by the great circle distance between the respective two nodes it connected. The migratory distance from any population center to either South Africa or another population center was computed using the shortest distance on this graph with the *igraph* package in R (4).

### **Quadratic term for RU1-1 univariate analysis**

To test whether the fit for the analyses depicted in Figure 2 and Table 2 could be improved, we performed the post hoc univariate analysis of the effect of RU1-1 using a quadratic term for RU1-1 (Table S6). RU1-1 was modeled by an orthogonal polynomial basis of order two for the RU1-1 frequencies (using the *poly* function in R) to remove collinearity between first-order (linear) and second-order (quadratic) terms. We repeated this analysis over the sample of 43 populations. Although in this sample the quadratic model was a better fit and provided a better explanation for variation in the log-transformed consonant counts than a model with only linear terms, this could change with expanded datasets in the future. We chose to use only the simplest model in our main text as it is the most conservative solution.

### **References**

1. Bates D, Mächler M, Bolker B, & Walker S (2015) Fitting Linear Mixed-Effects Models Using lme4. *2015* 67(1):48.
2. Ramachandran S & Rosenberg NA (2011) A test of the influence of continental axes of orientation on patterns of human gene flow. *American journal of physical anthropology* 146(4):515-529.
3. Henn BM, *et al.* (2011) Hunter-gatherer genomic diversity suggests a southern African origin for modern humans. *Proceedings of the National Academy of Sciences of the United States of America* 108(13):5154-5162.
4. Csardi G & Nepusz T (2006) The igraph software package for complex network research. *InterJournal, Complex Systems* 1695(5):1-9.
5. Rajeevan H, *et al.* (2003) ALFRED: the ALlele FREquency Database. Update. *Nucleic acids research* 31(1):270-271.

## SUPPLEMENTARY FIGURES

**Supplementary Figure S1.** Alignment of the 16 most common human READ1 sequences. READ1 is composed of seven repeat units: RU1 is GAGAGGAAGGAAA, RU2 is GGAA, SNP1 is GAAA, RU3 is GGAA, Constant Region is GGAAGAATGAA, RU4 is GGAA, RU5 is GGGA.

| REPEAT UNIT 1 (RU1)         | REPEAT UNIT 2 (RU2)                | SNP1      | RU3                   | Constant         | RU4      | RU5       |  |
|-----------------------------|------------------------------------|-----------|-----------------------|------------------|----------|-----------|--|
| GAGAGGAAGGAAA-----          | CGAAGGAAGGAAGGAAGGAA-----          | AAAA----- | GGAAGGAAGGAAAGAAATGAA | GGAAGGAAGGAAGGAA | GGGAGGGA | Allele 3  |  |
| GAGAGGAAGGAAA-----          | CGAAGGAAGGAAGGAAGGAA-----          | AAAA----- | GGAAGGAAGGAAAGAAATGAA | GGAAGGAAGGAAGGAA | GGGAGGGA | Allele 9  |  |
| GAGAGGAAGGAAA-----          | CGAAGGAAGGAAGGAAGGAA-----          | AAAA----- | GGAAGGAAGGAAAGAAATGAA | GGAAGGAAGGAA     | GGGAGGGA | Allele 12 |  |
| GAGAGGAAGGAAAAGAGAGGAAGGAAA | CGAAGGAAGGAAGGAAGGAAAGGAAGGAAAGGAA | AAAA----- | GGAAGGAAGGAAAGAAATGAA | GGAAGGAAGGAA     | GGGAGGGA | Allele 13 |  |
| GAGAGGAAGGAAAAGAGAGGAAGGAAA | CGAAGGAAGGAAGGAAGGAAAGGAAGGAAAGGAA | AAAA----- | GGAAGGAAGGAAAGAAATGAA | GGAAGGAAGGAA     | GGGAGGGA | Allele 6  |  |
| GAGAGGAAGGAAAAGAGAGGAAGGAAA | CGAAGGAAGGAAGGAAGGAAAGGAAGGAAAGGAA | AAAA----- | GGAAGGAAGGAAAGAAATGAA | GGAAGGAAGGAA     | GGGAGGGA | Allele 11 |  |
| GAGAGGAAGGAAAAGAGAGGAAGGAAA | CGAAGGAAGGAAGGAAGGAAAGGAAGGAA      | AAAA----- | GGAAGGAAGGAAAGAAATGAA | GGAAGGAAGGAA     | GGGAGGGA | Allele 21 |  |
| GAGAGGAAGGAAAAGAGAGGAAGGAAA | CGAAGGAAGGAAGGAAAGGAAAGGAAAGGAA    | AAAA----- | GGAAGGAAGGAAAGAAATGAA | GGAAGGAAGGAA     | GGGAGGGA | Allele 10 |  |
| GAGAGGAAGGAAAAGAGAGGAAGGAAA | CGAAGGAAGGAAGGAAAGGAAAGGAAAGGAA    | AAAA----- | GGAAGGAAGGAAAGAAATGAA | GGAAGGAAGGAA     | GGGAGGGA | Allele 16 |  |
| GAGAGGAAGGAAAAGAGAGGAAGGAAA | CGAAGGAAGGAAGGAAGGAAAGGAAGGAAAGGAA | AAAA----- | GGAAGGAAGGAAAGAAATGAA | GGAAGGAAGGAA     | GGGAGGGA | Allele 4  |  |
| GAGAGGAAGGAAAAGAGAGGAAGGAAA | CGAAGGAAGGAAGGAAGGAAAGGAAGGAAAGGAA | AAAA----- | GGAAGGAAGGAAAGAAATGAA | GGAAGGAAGGAA     | GGGAGGGA | Allele 1  |  |
| GAGAGGAAGGAAAAGAGAGGAAGGAAA | CGAAGGAAGGAAGGAAGGAAAGGAAGGAAAGGAA | AAAA----- | GGAAGGAAGGAAAGAAATGAA | GGAAGGAAGGAA     | GGGAGGGA | Allele 5  |  |
| GAGAGGAAGGAAAAGAGAGGAAGGAAA | CGAAGGAAGGAAGGAAGGAAAGGAAGGAAAGGAA | AAAA----- | GGAAGGAAGGAAAGAAATGAA | GGAAGGAAGGAA     | GGGAGGGA | Allele 14 |  |
| GAGAGGAAGGAAAAGAGAGGAAGGAAA | CGAAGGAAGGAAGGAAGGAAAGGAAGGAAAGGAA | AAAAAGAA  | GGAAGGAAGGAAAGAAATGAA | GGAAGGAAGGAA     | GGGAGGGA | Allele 18 |  |
| GAGAGGAAGGAAAAGAGAGGAAGGAAA | CGAAGGAAGGAAGGAAGGAAAGGAAGGAAAGGAA | AAAAAGAA  | GGAAGGAAGGAAAGAAATGAA | GGAAGGAAGGAA     | GGGAGGGA | Allele 15 |  |
| GAGAGGAAGGAAAAGAGAGGAAGGAAA | CGAAGGAAGGAAGGAAGGAAAGGAAGGAAAGGAA | -----     | -----                 | GGAAGGAAGGAA     | GGGAGGGA | Allele 19 |  |

**Supplementary Figure S2.** READ1 allele distributions among world populations. READ1 was sequenced in samples from 43 populations. The populations are arranged on the y-axis reflecting their migrational history, going from Africa to the southern tip of the Americas. Alleles are represented on the x-axis as percentages of the whole. In green is the frequency of a complete deletion of READ1. Black represents residual alleles (sum of all rare alleles). Alleles that are only seen in one population and at a frequency less than 0.02 are assigned to the residual alleles group.

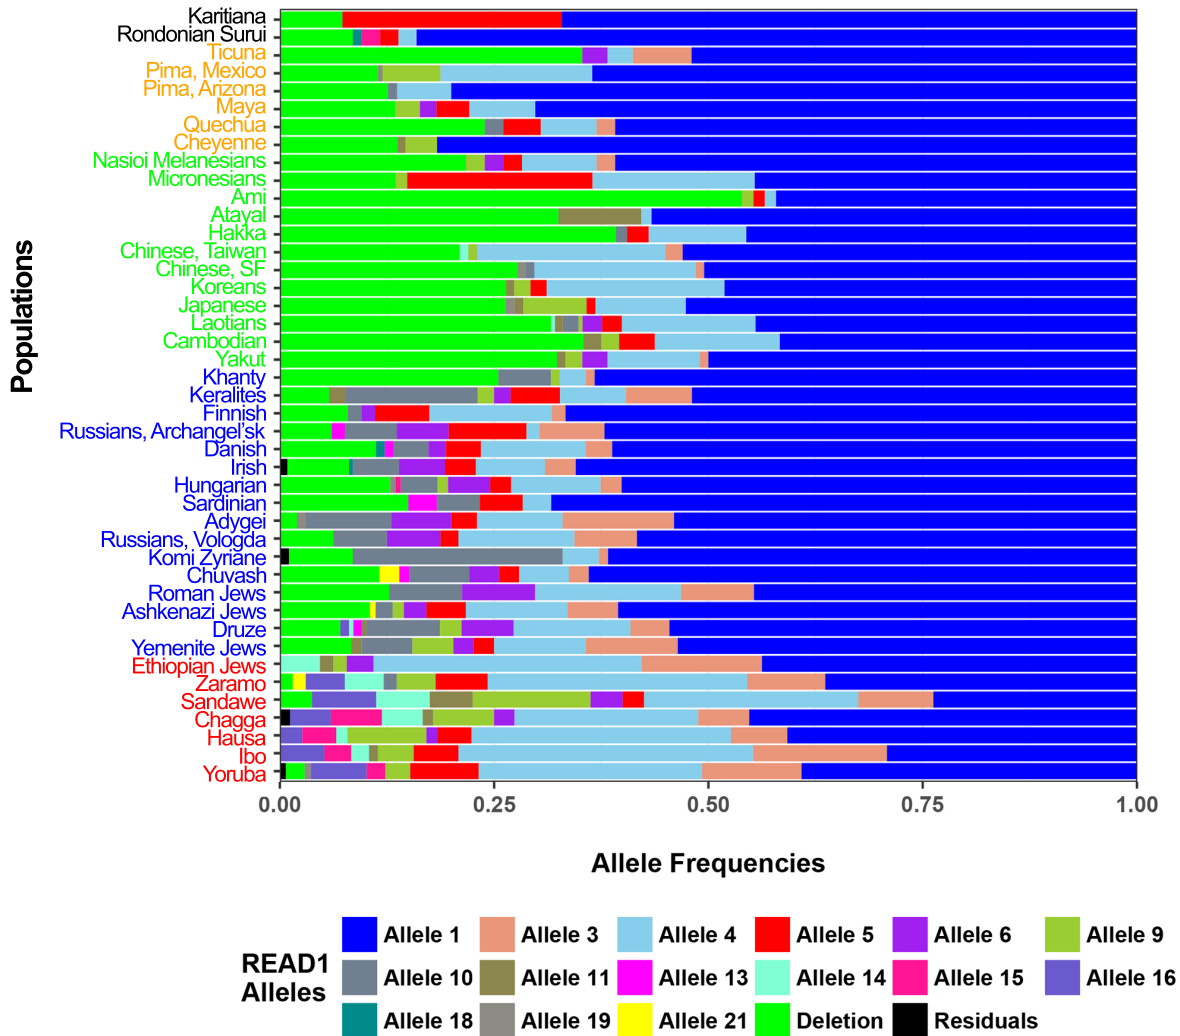

**Supplementary Figure S3.** Distribution of principal component scores of the tau matrix. Principal component one (PC1) accounts for 82.63% of the variation, PC2 accounts for 14.68%, and PC3 accounts for 2.05%.

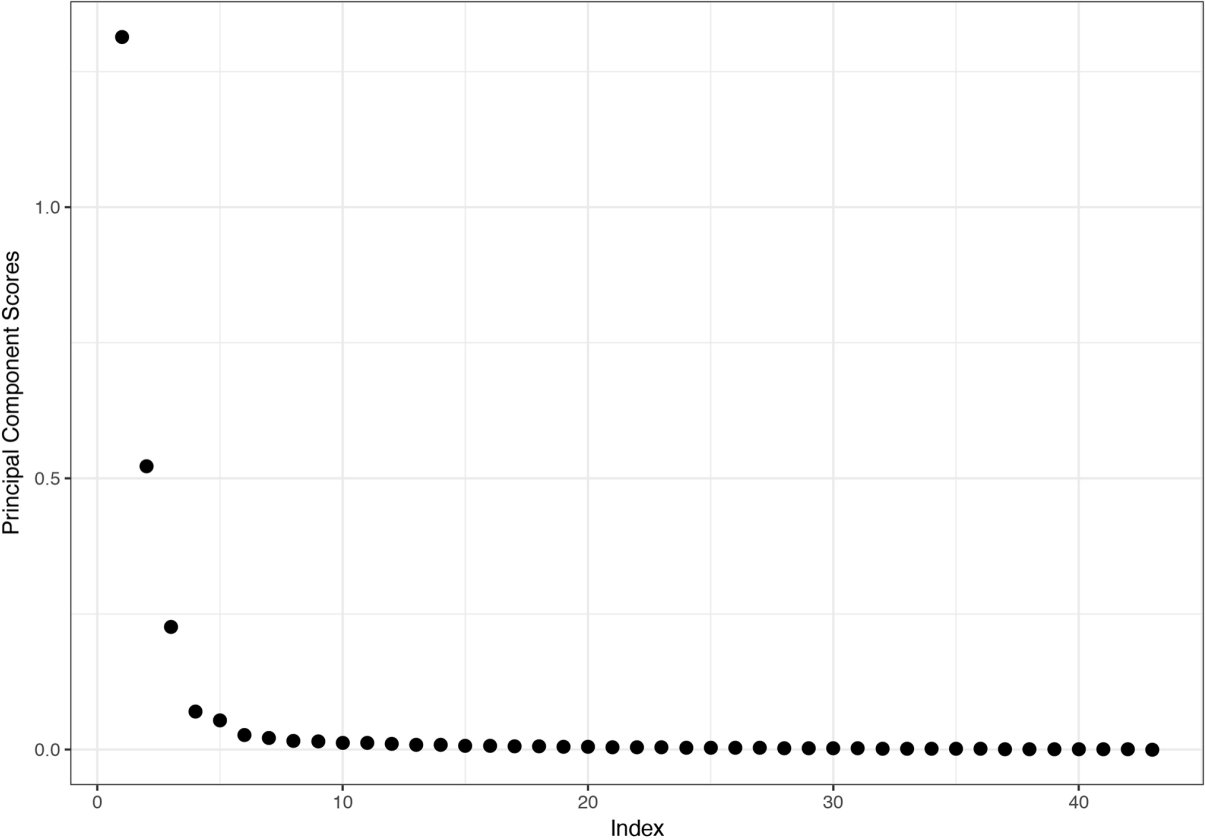

**Supplementary Figure S4.** Continental clustering. Dendrograms generated from centroid clustering of the tau genetic relatedness matrix. Populations are colored by the continental group to which they are assigned: Africa (red), Middle East and Europe (blue), Asia (green), America (orange), South America (black).

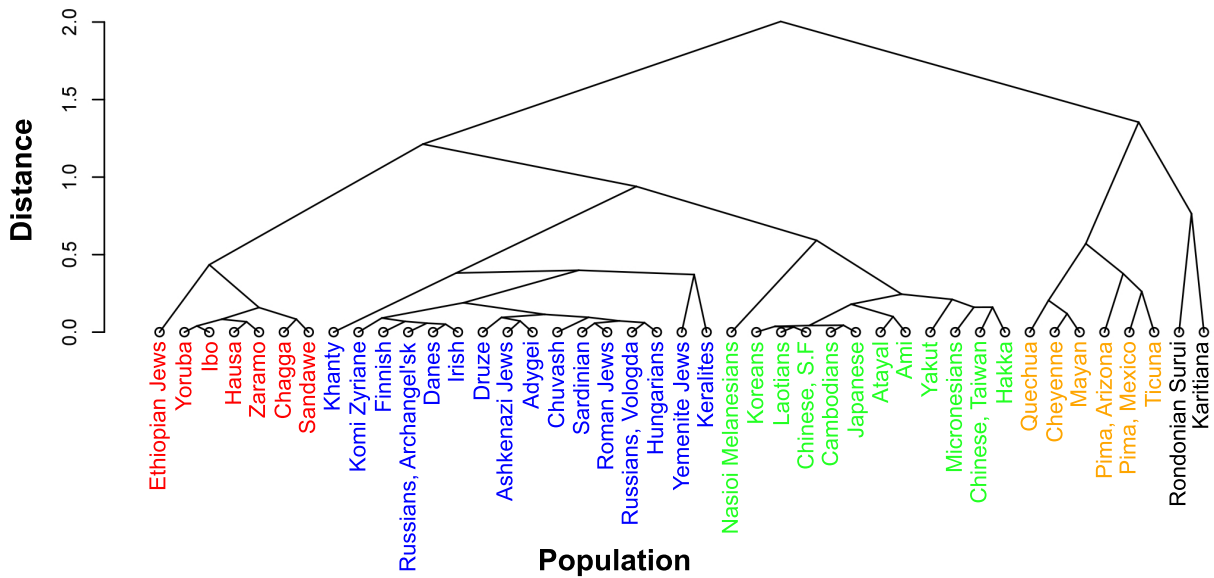

**Supplementary Figure S5.** 3D representation of the first three principal components of the tau genetic relatedness matrix, colored by continental groups. PCs represent geographical diversity. Populations map to continental groupings using first three PCs of the tau genetic relatedness matrix

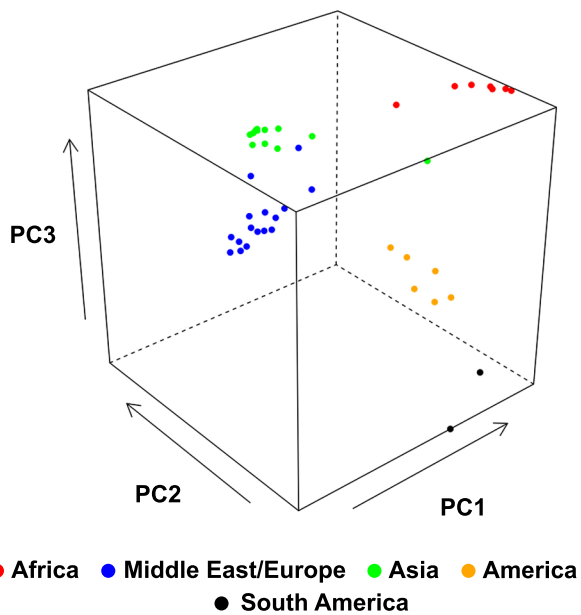

**Supplementary Figure S6.** Population pairwise comparisons of genetic distance and geographic distance. (a) Logarithms of kilometer geographic distances between pairs of populations are plotted on the x-axis, whereas genetic distances (using the first three PCs of the tau genetic relatedness matrix) are plotted on the y-axis (Pearson's product-moment correlation  $\rho = 0.69$ , 95% CI = (0.66, 0.72)). (b) Geographic distances between populations using migratory way points and a proposed origin in South Africa are plotted on the x-axis, genetic distances are plotted on the y-axis (Pearson's product-moment correlation  $\rho = 0.71$ , 95% CI = (0.68, 0.74)). (c) Geographic distances from South Africa for each population using migratory way points are plotted on the x-axis, Principal Component 1 scores are plotted on the y-axis. Points are colored by continental group.

(a)

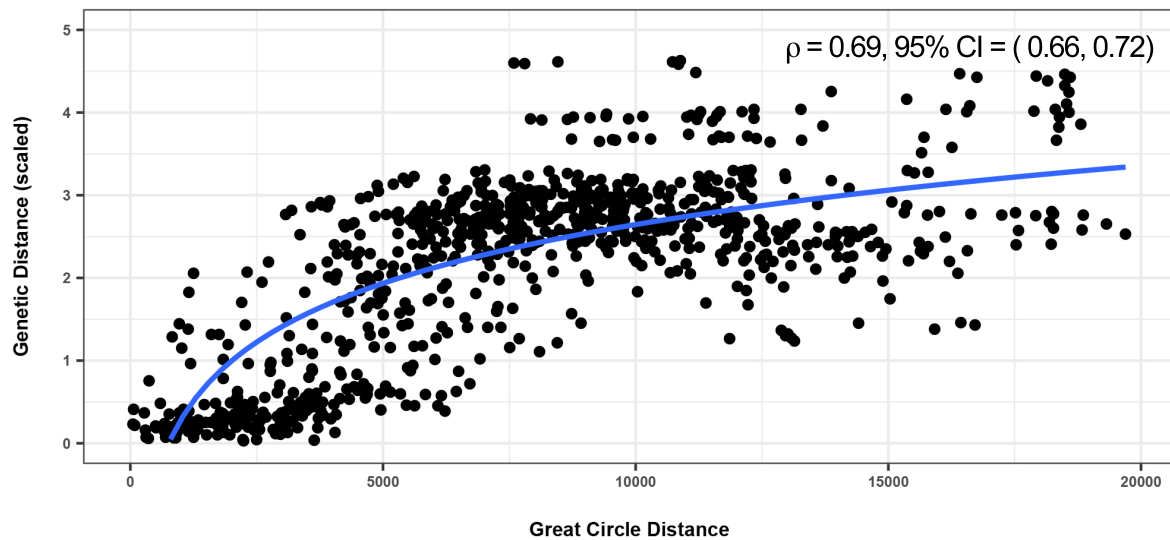



(b)

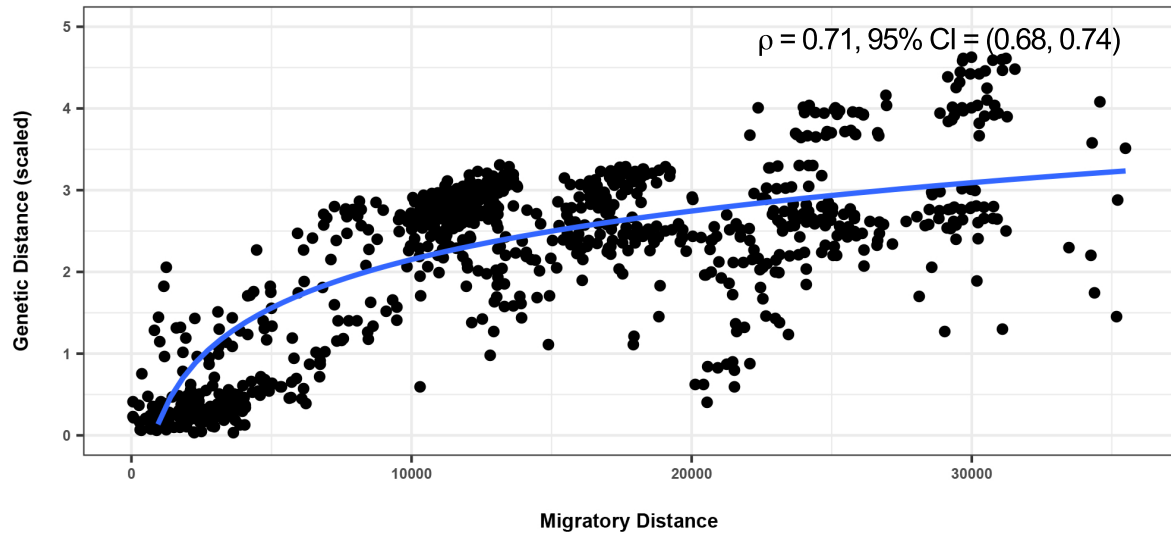

(c)

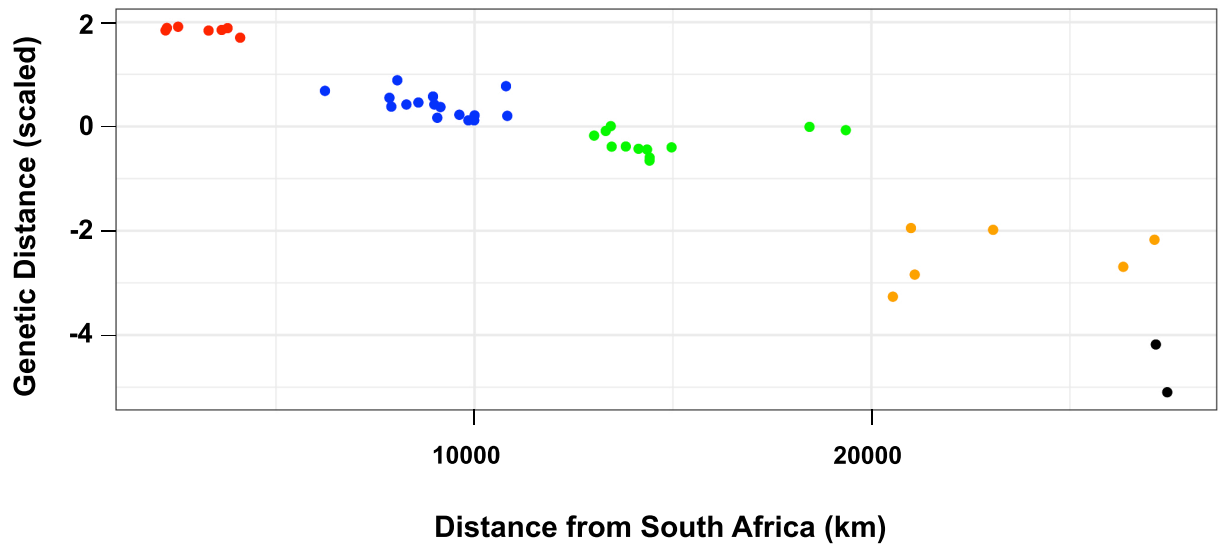

**Supplementary Table S1.** READ1 alleles observed in previous studies.

| Allele | Repeat unit 1    | Repeat unit 2                   | SNP1    | Repeat unit 3 | Const. Region | Repeat unit 4 | Repeat Unit 5 | Length |
|--------|------------------|---------------------------------|---------|---------------|---------------|---------------|---------------|--------|
| 1      | (GAGAGGAAGGAAA)2 | (GGAA)7                         | (GAAA)1 | (GGAA)2       | GGAAAGAATGAA  | (GGAA)4       | (GGGA)2       | 102    |
| 2      | (GAGAGGAAGGAAA)1 | (GGAA)9                         | (GAAA)0 | (GGAA)0       | GGAAAGAATGAA  | (GGAA)4       | (GGGA)2       | 85     |
| 3      | (GAGAGGAAGGAAA)1 | (GGAA)6                         | (GAAA)1 | (GGAA)2       | GGAAAGAATGAA  | (GGAA)4       | (GGGA)2       | 85     |
| 4      | (GAGAGGAAGGAAA)2 | (GGAA)6                         | (GAAA)1 | (GGAA)2       | GGAAAGAATGAA  | (GGAA)4       | (GGGA)2       | 98     |
| 5      | (GAGAGGAAGGAAA)2 | (GGAA)8                         | (GAAA)1 | (GGAA)2       | GGAAAGAATGAA  | (GGAA)4       | (GGGA)2       | 106    |
| 6      | (GAGAGGAAGGAAA)2 | (GGAA)8                         | (GAAA)1 | (GGAA)2       | GGAAAGAATGAA  | (GGAA)3       | (GGGA)2       | 102    |
| 7      | (GAGAGGAAGGAAA)2 | (GGAA)8                         | (GAAA)1 | (GGAA)1       | GGAAAGAATGAA  | (GGAA)4       | (GGGA)2       | 102    |
| 8      | (GAGAGGAAGGAAA)2 | (GGAA)7                         | (GAAA)0 | (GGAA)0       | GGAAAGAATGAA  | (GGAA)4       | (GGGA)2       | 90     |
| 9      | (GAGAGGAAGGAAA)1 | (GGAA)7                         | (GAAA)1 | (GGAA)2       | GGAAAGAATGAA  | (GGAA)4       | (GGGA)2       | 89     |
| 10     | (GAGAGGAAGGAAA)2 | (GGAA)4                         | (GAAA)1 | (GGAA)2       | GGAAAGAATGAA  | (GGAA)4       | (GGGA)2       | 90     |
| 11     | (GAGAGGAAGGAAA)2 | (GGAA)7                         | (GAAA)1 | (GGAA)2       | GGAAAGAATGAA  | (GGAA)3       | (GGGA)2       | 98     |
| 12     | (GAGAGGAAGGAAA)1 | (GGAA)8                         | (GAAA)1 | (GGAA)2       | GGAAAGAATGAA  | (GGAA)3       | (GGGA)2       | 89     |
| 13     | (GAGAGGAAGGAAA)2 | (GGAA)9                         | (GAAA)1 | (GGAA)2       | GGAAAGAATGAA  | (GGAA)3       | (GGGA)2       | 106    |
| 14     | (GAGAGGAAGGAAA)2 | (GGAA)9                         | (GAAA)1 | (GGAA)2       | GGAAAGAATGAA  | (GGAA)4       | (GGGA)2       | 110    |
| 15     | (GAGAGGAAGGAAA)2 | (GGAA)5                         | (GAAA)2 | (GGAA)2       | GGAAAGAATGAA  | (GGAA)4       | (GGGA)2       | 98     |
| 16     | (GAGAGGAAGGAAA)2 | (GGAA)5                         | (GAAA)1 | (GGAA)2       | GGAAAGAATGAA  | (GGAA)4       | (GGGA)2       | 94     |
| 17     | (GAGAGGAAGGAAA)2 | (GGAA)4                         | (GAAA)2 | (GGAA)2       | GGAAAGAATGAA  | (GGAA)4       | (GGGA)2       | 94     |
| 18     | (GAGAGGAAGGAAA)2 | (GGAA)7                         | (GAAA)2 | (GGAA)2       | GGAAAGAATGAA  | (GGAA)4       | (GGGA)2       | 106    |
| 19     | (GAGAGGAAGGAAA)2 | (GGAA)9                         | (GAAA)0 | (GGAA)0       | GGAAAGAATGAA  | (GGAA)4       | (GGGA)2       | 98     |
| 20     | (GAGAGGAAGGAAA)2 | (GGAA)10                        | (GAAA)1 | (GGAA)2       | GGAAAGAATGAA  | (GGAA)4       | (GGGA)2       | 114    |
| 21     | (GAGAGGAAGGAAA)2 | (GGAA)6                         | (GAAA)1 | (GGAA)2       | GGAAAGAATGAA  | (GGAA)3       | (GGGA)2       | 94     |
| 22     | (GAGAGGAAGGAAA)2 | (GGAA)10                        | (GAAA)0 | (GGAA)0       | GGAAAGAATGAA  | (GGAA)4       | (GGGA)2       | 102    |
| 23     | (GAGAGGAAGGAAA)2 | (GGAA)11                        | (GAAA)0 | (GGAA)0       | GGAAAGAATGAA  | (GGAA)4       | (GGGA)2       | 106    |
| 24     | (GAGAGGAAGGAAA)2 | (GGAA)6                         | (GAAA)2 | (GGAA)2       | GGAAAGAATGAA  | (GGAA)4       | (GGGA)2       | 102    |
| 25     | (GAGAGGAAGGAAA)1 | (GGAA)8                         | (GAAA)1 | (GGAA)2       | GGAAAGAATGAA  | (GGAA)4       | (GGGA)2       | 93     |
| 26     | (GAGAGGAAGGAAA)2 | (GGAA)5                         | (GAAA)1 | (GGAA)2       | GGAAAGAATGAA  | (GGAA)3       | (GGGA)2       | 90     |
| 27     | (GAGAGGAAGGAAA)1 | (GGAA)5                         | (GAAA)1 | (GGAA)2       | GGAAAGAATGAA  | (GGAA)4       | (GGGA)2       | 81     |
| 28     | (GAGAGGAAGGAAA)2 | (GGAA)7                         | (GAAA)1 | (GGAA)2       | GGAAAGAATGAA  | (GGAA)5       | (GGGA)2       | 106    |
| 29     | (GAGAGGAAGGAAA)2 | (GGAA)5+(G<br>GGA)1+(GGA<br>A)1 | (GAAA)1 | (GGAA)2       | GGAAAGAATGAA  | (GGAA)4       | (GGGA)2       | 102    |
| 30     | (GAGAGGAAGGAAA)2 | (GGAA)5                         | (GAAA)1 | (GGAA)4       | GGAAAGAATGAA  | (GGAA)4       | (GGGA)2       | 102    |

|     |                                       |                                  |         |                         |              |                                 |         |     |
|-----|---------------------------------------|----------------------------------|---------|-------------------------|--------------|---------------------------------|---------|-----|
| 31  | (GAGAGGAAGGAAA)2                      | (GGAA)7                          | (GAAA)1 | (GGAA)1<br>+(GGGA)<br>1 | GGAAAGAATGAA | (GGAA)4                         | (GGGA)2 | 102 |
| 32  | (GAGAGGAAGGAAA)2                      | (GGAA)8                          | (GAAA)0 | (GGAA)0                 | GGAAAGAATGAA | (GGAA)4                         | (GGGA)2 | 94  |
| 33  | (GAGAGGAAGGAAA)2                      | (GGAA)6                          | (GAAA)0 | (GGAA)0                 | GGAAAGAATGAA | (GGAA)3                         | (GGGA)2 | 82  |
| 34  | (GAGAGGAAGGAAA)2                      | (GGAA)7                          | (GAAA)2 | (GGAA)2                 | GGAAAGAATGAA | (GGAA)3                         | (GGGA)2 | 102 |
| 35  | (GAGAGGAAGGAAA)1+(G<br>AGAGGAAGAAAA)1 | (GGAA)7                          | (GAAA)1 | (GGAA)2                 | GGAAAGAATGAA | (GGAA)4                         | (GGGA)2 | 102 |
| 36  | (GAGAGGAAGGAAA)1+(G<br>AGAGGAAGGAA)1  | (GGAA)9                          | (GAAA)1 | (GGAA)2                 | GGAAAGAATGAA | (GGAA)4                         | (GGGA)2 | 109 |
| 37  | (GAGAGGAAGGAAA)2                      | (GGAA)6                          | (GAAA)1 | (GGAA)2                 | GGAAAGAATGAA | (GGAA)1+<br>(GAAA)1+<br>(GGAA)2 | (GGGA)2 | 98  |
| 38  | (GAGAGGAAGGAAA)1                      | (GGAA)10                         | (GAAA)0 | (GGAA)0                 | GGAAAGAATGAA | (GGAA)4                         | (GGGA)2 | 89  |
| 39  | (GAGAGGAAGGAAA)1                      | (GGAA)5                          | (GAAA)2 | (GGAA)2                 | GGAAAGAATGAA | (GGAA)4                         | (GGGA)2 | 85  |
| 40  | (GAGAGGAAGGAAA)2                      | (GGAA)2+(G<br>GAAA)1+(GG<br>AA)7 | (GAAA)1 | (GGAA)2                 | GGAAAGAATGAA | (GGAA)4                         | (GGGA)2 | 115 |
| Del | x                                     | x                                | x       | x                       | x            | x                               | x       | x   |

Reprinted with permission from Powers NR, *et al.* (2013) Alleles of a polymorphic ETV6 binding site in DCDC2 confer risk of reading and language impairment. *Am J Hum Genet* 93:19-28.

**Supplementary Table S2:** READ1 allele frequencies in populations studied. Included are all alleles observed in at least one population.

| Population          | N   | Deletion | Allele 1 | Allele 2 | Allele 3 | Allele 4 | Allele 5 | Allele 6 | Allele 9 | Allele 10 | Allele 11 | Allele 12 | Allele 13 | Allele 14 | Allele 15 | Allele 16 |
|---------------------|-----|----------|----------|----------|----------|----------|----------|----------|----------|-----------|-----------|-----------|-----------|-----------|-----------|-----------|
| Yoruba              | 69  | 0.022    | 0.391    | 0.000    | 0.116    | 0.261    | 0.080    | 0.000    | 0.029    | 0.000     | 0.000     | 0.007     | 0.000     | 0.000     | 0.022     | 0.065     |
| Ibo                 | 48  | 0.000    | 0.292    | 0.000    | 0.156    | 0.344    | 0.052    | 0.000    | 0.042    | 0.000     | 0.010     | 0.000     | 0.000     | 0.021     | 0.031     | 0.052     |
| Hausa               | 38  | 0.000    | 0.408    | 0.000    | 0.066    | 0.303    | 0.039    | 0.013    | 0.092    | 0.000     | 0.000     | 0.000     | 0.000     | 0.013     | 0.039     | 0.026     |
| Chagga              | 42  | 0.000    | 0.452    | 0.000    | 0.060    | 0.214    | 0.000    | 0.024    | 0.071    | 0.000     | 0.012     | 0.000     | 0.000     | 0.048     | 0.060     | 0.048     |
| Sandawe             | 40  | 0.038    | 0.238    | 0.000    | 0.088    | 0.250    | 0.025    | 0.038    | 0.138    | 0.000     | 0.050     | 0.000     | 0.000     | 0.063     | 0.000     | 0.075     |
| Zaramo              | 33  | 0.015    | 0.364    | 0.000    | 0.091    | 0.303    | 0.061    | 0.000    | 0.045    | 0.015     | 0.000     | 0.000     | 0.000     | 0.045     | 0.000     | 0.045     |
| Ethiopian<br>Jews   | 32  | 0.000    | 0.438    | 0.000    | 0.141    | 0.313    | 0.000    | 0.031    | 0.016    | 0.000     | 0.016     | 0.000     | 0.000     | 0.047     | 0.000     | 0.000     |
| Yemenite<br>Jews    | 42  | 0.083    | 0.536    | 0.000    | 0.107    | 0.107    | 0.024    | 0.024    | 0.048    | 0.060     | 0.012     | 0.000     | 0.000     | 0.000     | 0.000     | 0.000     |
| Druze               | 99  | 0.071    | 0.545    | 0.000    | 0.045    | 0.136    | 0.000    | 0.061    | 0.025    | 0.086     | 0.005     | 0.000     | 0.010     | 0.005     | 0.000     | 0.010     |
| Ashkenazi<br>Jews   | 76  | 0.105    | 0.605    | 0.000    | 0.059    | 0.118    | 0.046    | 0.026    | 0.013    | 0.020     | 0.000     | 0.000     | 0.000     | 0.000     | 0.000     | 0.000     |
| Roman Jew           | 24  | 0.128    | 0.447    | 0.000    | 0.085    | 0.170    | 0.000    | 0.085    | 0.000    | 0.085     | 0.000     | 0.000     | 0.000     | 0.000     | 0.000     | 0.000     |
| Chuvash             | 43  | 0.116    | 0.640    | 0.000    | 0.023    | 0.058    | 0.023    | 0.035    | 0.000    | 0.070     | 0.000     | 0.000     | 0.012     | 0.000     | 0.000     | 0.000     |
| Komi                | 47  | 0.074    | 0.617    | 0.011    | 0.011    | 0.043    | 0.000    | 0.000    | 0.000    | 0.245     | 0.000     | 0.000     | 0.000     | 0.000     | 0.000     | 0.000     |
| Russian,<br>Vologda | 48  | 0.063    | 0.583    | 0.000    | 0.073    | 0.135    | 0.021    | 0.063    | 0.000    | 0.063     | 0.000     | 0.000     | 0.000     | 0.000     | 0.000     | 0.000     |
| Adygei              | 50  | 0.020    | 0.540    | 0.000    | 0.130    | 0.100    | 0.030    | 0.070    | 0.000    | 0.100     | 0.000     | 0.000     | 0.000     | 0.000     | 0.000     | 0.000     |
| Sardinian           | 30  | 0.150    | 0.683    | 0.000    | 0.000    | 0.033    | 0.050    | 0.000    | 0.000    | 0.050     | 0.000     | 0.000     | 0.033     | 0.000     | 0.000     | 0.000     |
| Hungarians          | 82  | 0.129    | 0.601    | 0.000    | 0.025    | 0.104    | 0.025    | 0.049    | 0.012    | 0.043     | 0.000     | 0.000     | 0.000     | 0.000     | 0.006     | 0.000     |
| Irish               | 112 | 0.072    | 0.655    | 0.000    | 0.036    | 0.081    | 0.036    | 0.054    | 0.000    | 0.054     | 0.000     | 0.000     | 0.000     | 0.000     | 0.000     | 0.000     |
| Danes               | 49  | 0.112    | 0.612    | 0.000    | 0.031    | 0.122    | 0.041    | 0.020    | 0.000    | 0.041     | 0.000     | 0.000     | 0.010     | 0.000     | 0.000     | 0.000     |



|                 |    |       |       |       |       |       |       |       |       |       |       |       |       |       |       |       |
|-----------------|----|-------|-------|-------|-------|-------|-------|-------|-------|-------|-------|-------|-------|-------|-------|-------|
| Rondonian Surui | 47 | 0.085 | 0.840 | 0.000 | 0.000 | 0.021 | 0.021 | 0.000 | 0.000 | 0.000 | 0.000 | 0.000 | 0.000 | 0.000 | 0.021 | 0.000 |
| Karitiana       | 41 | 0.073 | 0.671 | 0.000 | 0.000 | 0.000 | 0.256 | 0.000 | 0.000 | 0.000 | 0.000 | 0.000 | 0.000 | 0.000 | 0.000 | 0.000 |

| Population       | N  | Allele 18 | Allele 19 | Allele 20 | Allele 21 | Allele 22 |
|------------------|----|-----------|-----------|-----------|-----------|-----------|
| Yoruba           | 69 | 0.000     | 0.007     | 0.000     | 0.000     | 0.000     |
| Ibo              | 48 | 0.000     | 0.000     | 0.000     | 0.000     | 0.000     |
| Hausa            | 38 | 0.000     | 0.000     | 0.000     | 0.000     | 0.000     |
| Chagga           | 42 | 0.000     | 0.000     | 0.000     | 0.000     | 0.000     |
| Sandawe          | 40 | 0.000     | 0.000     | 0.000     | 0.000     | 0.000     |
| Zaramo           | 33 | 0.000     | 0.000     | 0.000     | 0.015     | 0.000     |
| Ethiopian Jews   | 32 | 0.000     | 0.000     | 0.000     | 0.000     | 0.000     |
| Yemenite Jews    | 42 | 0.000     | 0.000     | 0.000     | 0.000     | 0.000     |
| Druze            | 99 | 0.000     | 0.000     | 0.000     | 0.000     | 0.000     |
| Ashkenazi Jews   | 76 | 0.000     | 0.000     | 0.000     | 0.007     | 0.000     |
| Roman Jews       | 24 | 0.000     | 0.000     | 0.000     | 0.000     | 0.000     |
| Chuvash          | 43 | 0.000     | 0.000     | 0.000     | 0.023     | 0.000     |
| Komi             | 47 | 0.000     | 0.000     | 0.000     | 0.000     | 0.000     |
| Russian, Vologda | 48 | 0.000     | 0.000     | 0.000     | 0.000     | 0.000     |
| Adygei           | 50 | 0.000     | 0.010     | 0.000     | 0.000     | 0.000     |
| Sardinian        | 30 | 0.000     | 0.000     | 0.000     | 0.000     | 0.000     |
| Hungarians       | 82 | 0.000     | 0.006     | 0.000     | 0.000     | 0.000     |

|                          |     |       |       |       |       |       |
|--------------------------|-----|-------|-------|-------|-------|-------|
| Irish                    | 112 | 0.004 | 0.000 | 0.000 | 0.000 | 0.009 |
| Danes                    | 49  | 0.010 | 0.000 | 0.000 | 0.000 | 0.000 |
| Russian,<br>Archangel'sk | 33  | 0.000 | 0.000 | 0.000 | 0.000 | 0.000 |
| Finns                    | 32  | 0.000 | 0.000 | 0.000 | 0.000 | 0.000 |
| Keralites                | 26  | 0.000 | 0.000 | 0.000 | 0.000 | 0.000 |
| Khanty                   | 49  | 0.000 | 0.000 | 0.000 | 0.000 | 0.000 |
| Yakut                    | 51  | 0.000 | 0.000 | 0.000 | 0.000 | 0.000 |
| Cambodians               | 24  | 0.000 | 0.000 | 0.000 | 0.000 | 0.000 |
| Laotians                 | 109 | 0.000 | 0.000 | 0.000 | 0.000 | 0.000 |
| Japanese                 | 48  | 0.000 | 0.011 | 0.000 | 0.000 | 0.000 |
| Koreans                  | 53  | 0.000 | 0.000 | 0.000 | 0.000 | 0.000 |
| Chinese,<br>S.F.         | 51  | 0.000 | 0.010 | 0.000 | 0.000 | 0.000 |
| Chinese,<br>Taiwan       | 50  | 0.000 | 0.000 | 0.000 | 0.000 | 0.000 |
| Hakka                    | 40  | 0.000 | 0.000 | 0.000 | 0.000 | 0.000 |
| Atayal                   | 42  | 0.000 | 0.000 | 0.000 | 0.000 | 0.000 |
| Ami                      | 38  | 0.000 | 0.000 | 0.000 | 0.000 | 0.000 |
| Micronesians             | 37  | 0.000 | 0.000 | 0.000 | 0.000 | 0.000 |
| Nasioi<br>Melanesians    | 23  | 0.000 | 0.000 | 0.000 | 0.000 | 0.000 |
| Cheyenne                 | 55  | 0.000 | 0.000 | 0.000 | 0.000 | 0.000 |
| Quechua                  | 23  | 0.000 | 0.000 | 0.000 | 0.000 | 0.000 |
| Maya                     | 52  | 0.000 | 0.000 | 0.000 | 0.000 | 0.000 |

|                    |    |       |       |       |       |       |
|--------------------|----|-------|-------|-------|-------|-------|
| Pima,<br>Arizona   | 48 | 0.000 | 0.000 | 0.000 | 0.000 | 0.000 |
| Pima,<br>Mexico    | 96 | 0.000 | 0.005 | 0.000 | 0.000 | 0.000 |
| Ticuna             | 51 | 0.000 | 0.000 | 0.000 | 0.000 | 0.000 |
| Rondonian<br>Surui | 47 | 0.011 | 0.000 | 0.000 | 0.000 | 0.000 |
| Karitiana          | 41 | 0.000 | 0.000 | 0.000 | 0.000 | 0.000 |



**Supplementary Table S3:** Summary of populations and linguistic data. Included are continental location, population name, abbreviation, language name, language family, top-level language family, ISO code for the language assignment, listing of numbers of phonemes, consonants, vowels, and database sources for phoneme counts. General descriptions of these populations can be found in [alfred.med.yale.edu](http://alfred.med.yale.edu) (5).

| <b>Continental Group</b> | <b>Population</b> | <b>popcode</b> | <b>Language</b>         | <b>Family</b> | <b>Top-level family</b> | <b>ISO</b> | <b>Phonemes</b> | <b>Consonants</b> | <b>Vowels</b> | <b>Source</b> |
|--------------------------|-------------------|----------------|-------------------------|---------------|-------------------------|------------|-----------------|-------------------|---------------|---------------|
| Africa                   | Yoruba            | YOR            | Yoruba                  | Ede           | Atlantic-Congo          | yor        | 30              | 18.25             | 10.25         | (1-4)         |
| Africa                   | Ibo               | IBO            | Igbo                    | Igboid        | Atlantic-Congo          | ibo        | 49.25           | 36                | 11.75         | (4-7)         |
| Africa                   | Hausa             | HSA            | Hausa                   | Chadic        | Afroasiatic             | hau        | 39.4            | 30.6              | 7.6           | (4, 8-10)     |
| Africa                   | Chagga            | CGA            | Moshi                   | Narrow Bantu  | Atlantic-Congo          | old        | 25              | 20                | 5             | (11)          |
| Africa                   | Sandawe           | SND            | Sandawe                 | Isolate       | Isolate                 | sad        | 56              | 44.33             | 9             | (4, 12, 13)   |
| Africa                   | Zaramo            | ZRM            | Zaramo                  | Narrow Bantu  | Atlantic-Congo          | zaj        | 24              | 19                | 5             | (14, 15)      |
| Africa                   | Ethiopian Jews    | ETJ            | Qimant                  | Agaw          | Afro-Asiatic            | ahg        | 39              | 28                | 7             | (16)          |
| Middle East, Europe      | Yemenite Jews     | YMJ            | Ancient Hebrew          | Semitic       | Afro-Asiatic            | hbo        | 33              | 27                | 6             | (17)          |
| Middle East, Europe      | Druze             | DRU            | Arabic, North Levantine | Semitic       | Afro-Asiatic            | apc        | 27.5            | 20                | 7.5           | (4, 18)       |
| Middle East, Europe      | Ashkenazi Jews    | ASH            | Ancient Hebrew          | Semitic       | Afro-Asiatic            | hbo        | 33              | 27                | 6             | (17)          |
| Middle East, Europe      | Roman Jews        | RMJ            | Ancient Hebrew          | Semitic       | Afro-Asiatic            | hbo        | 33              | 27                | 6             | (17)          |
| Middle East, Europe      | Chuvash           | CHV            | Chuvash                 | Turkic        | Turkic                  | chv        | 31.33           | 22.33             | 9             | (4, 19, 20)   |
| Middle East, Europe      | Komi-Zyrian       | KMZ            | Komi-Zyrian             | Uralic        | Uralic                  | kpv        | 33.67           | 26.67             | 7             | (4, 21, 22)   |
| Middle East, Europe      | Russian, Vologda  | RUV            | Russian                 | Slavic        | Indo-European           | rus        | 37              | 31.67             | 5.33          | (4, 23, 24)   |
| Middle East, Europe      | Adyghe            | ADY            | Adyghe                  | Circassian    | Abkhaz-Adyghe           | ady        | 48.5            | 44                | 4.5           | (4, 25)       |
| Middle East, Europe      | Sardinian         | SRD            | Sardinian               | Romance       | Indo-European           | srd        | 33              | 28                | 5             | (26)          |

|                     |                       |     |           |                    |                    |     |       |       |       |             |
|---------------------|-----------------------|-----|-----------|--------------------|--------------------|-----|-------|-------|-------|-------------|
| Middle East, Europe | Hungarian             | HGR | Hungarian | Uralic             | Uralic             | hun | 45    | 33    | 12    | (4, 27, 28) |
| Middle East, Europe | Irish                 | IRI | Irish     | Celtic             | Indo-European      | gle | 54    | 36    | 18    | (4, 29, 30) |
| Middle East, Europe | Danish                | DAN | Danish    | Germanic           | Indo-European      | dan | 32    | 16    | 16    | (4, 31)     |
| Middle East, Europe | Russian, Archangel'sk | RUA | Russian   | Slavic             | Indo-European      | rus | 37    | 31.67 | 5.33  | (4, 23, 24) |
| Middle East, Europe | Finnish               | FIN | Finnish   | Uralic             | Uralic             | fin | 29.33 | 18.33 | 11    | (4, 32, 33) |
| Middle East, Europe | Khanty                | KTY | Khanty    | Uralic             | Uralic             | kca | 31    | 18    | 13    | (34)        |
| Middle East, Europe | Keralites             | KER | Malayalam | Dravidian          | Dravidian          | mal | 39    | 29.5  | 9.5   | (4, 35)     |
| Asia                | Yakut                 | YAK | Yakut     | Turkic             | Turkic             | sah | 36.33 | 24.33 | 12    | (4, 36, 37) |
| Asia                | Cambodian             | CBD | Khmer     | Austronesian       | Austronesian       | khm | 38    | 21    | 17    | (4, 38, 39) |
| Asia                | Laotian               | LAO | Lao       | Tai-Kadai          | Tai-Kadai          | lao | 40    | 28    | 12    | (4, 40)     |
| Asia                | Japanese              | JPN | Japanese  | Japonic            | Japonic            | jpn | 27.67 | 19.33 | 7     | (4, 41, 42) |
| Asia                | Korean                | KOR | Korean    | Koreanic           | Koreanic           | kor | 34.67 | 21.33 | 12.67 | (4, 43)     |
| Asia                | Chinese, S.F.         | CHS | Cantonese | Sinitic            | Sino-Tibetan       | yue | 30    | 20.33 | 6     | (4, 44, 45) |
| Asia                | Chinese, Taiwan       | CHT | Taiwanese | Sinitic            | Sino-Tibetan       | nan | 25    | 19    | 6     | (46)        |
| Asia                | Hakka                 | HKA | Hakka     | Sinitic            | Sino-Tibetan       | hak | 27    | 18    | 5.67  | (4, 47, 48) |
| Asia                | Atayal                | ATL | Atayal    | Austronesian       | Austronesian       | tay | 25.67 | 19    | 6.67  | (4, 49)     |
| Asia                | Ami                   | AMI | Amis      | Austronesian       | Austronesian       | ami | 21    | 17.5  | 3.5   | (4, 50)     |
| Asia                | Micronesian           | MCR | Nauruan   | Malayo-Polynesian  | Austronesian       | nau | 27.5  | 18.5  | 9     | (4, 51)     |
| Asia                | Nasioi Melanesian     | NAS | Nasioi    | South Bougainville | South Bougainville | nas | 15.33 | 8     | 6.67  | (4, 52, 53) |
| North America       | Cheyenne              | CHY | Cheyenne  | Algonquian         | Algic              | chy | 15    | 10    | 3     | (4, 54)     |
| North America       | Pima, Arizona         | PMA | O'odham   | Uto-Aztecan        | Uto-Aztecan        | ood | 26.33 | 19.33 | 7     | (4, 55, 56) |

|               |                 |     |           |             |             |     |       |      |      |            |
|---------------|-----------------|-----|-----------|-------------|-------------|-----|-------|------|------|------------|
| North America | Pima, Mexico    | PMM | Pima Bajo | Uto-Aztecan | Uto-Aztecan | pia | 21.5  | 15.5 | 6    | (4, 57)    |
| North America | Mayan           | MAY | Yucatec   | Mayan       | Mayan       | yua | 28.5  | 20   | 7.5  | (4, 58)    |
| South America | Quechua         | QUE | Quechua   | Quechuan    | Quechuan    | quz | 29.5  | 25.5 | 4    | (4, 59)    |
| South America | Ticuna          | TIC | Ticuna    | Ticuna-Yuri | Ticuna-Yuri | tca | 32.75 | 17   | 11.5 | (4, 60-62) |
| South America | Rondonian Surui | SUR | Surui     | Tupian      | Tupian      | sru | 25.5  | 18   | 7.5  | (4, 63)    |
| South America | Karitiana       | KAR | Karitiãna | Tupian      | Tupian      | ktn | 25    | 11   | 14   | (64)       |

### References for Table S3

- 1 Chanard C & Hartell RL (2014) Yoruba sound inventory (AA) (Benin). *PHOIBLE Online*, eds Moran S, McCloy D, & Wright R (Max Planck Institute for Evolutionary Anthropology, Leipzig).
- 2 Chanard C & Hartell RL (2014) Yoruba sound inventory (AA) (Nigeria). *PHOIBLE Online*, eds Moran S, McCloy D, & Wright R (Max Planck Institute for Evolutionary Anthropology, Leipzig).
- 3 Database UPSI (2014) Yoruba sound inventory (UPSID). *PHOIBLE Online*, eds Moran S, McCloy D, & Wright R (Max Planck Institute for Evolutionary Anthropology, Leipzig).
- 4 Donohue M, Hetherington R, McElvenny J, & Dawson V (2013) World phonotactics database. (The Australian National University).
- 5 Chanard C & Hartell RL (2014) Nuclear Igbo sound inventory (AA). *PHOIBLE Online*, eds Moran S, McCloy D, & Wright R (Max Planck Institute for Evolutionary Anthropology, Leipzig).
- 6 Archive SP (2014) Nuclear Igbo sound inventory (SPA). *PHOIBLE Online*, eds Moran S, McCloy D, & Wright R (Max Planck Institute for Evolutionary Anthropology, Leipzig).
- 7 Database UPSI (2014) Nuclear Igbo sound inventory (UPSID). *PHOIBLE Online*, eds Moran S, McCloy D, & Wright R (Max Planck Institute for Evolutionary Anthropology, Leipzig).
- 8 Chanard C & Hartell RL (2014) Hausa sound inventory (AA) (Niger). *PHOIBLE Online*, eds Moran S, McCloy D, & Wright R (Max Planck Institute for Evolutionary Anthropology, Leipzig).
- 9 Chanard C, Hartell RL, & Wright R (2014) Hausa sound inventory (AA) (Nigeria). *PHOIBLE Online*, eds Moran S, McCloy D, & Wright R (Max Planck Institute for Evolutionary Anthropology, Leipzig).
- 10 Archive SP (2014) Hausa sound inventory (SPA). *PHOIBLE Online*, eds Moran S, McCloy D, & Wright R (Max Planck Institute for Evolutionary Anthropology, Leipzig).

- 11 Green C & Moran S (2015) Old Sound Inventory (GM). *PHOIBLE*, eds Moran S, McCloy D, & Wright R (Max Planck Institute for Evolutionary Anthropology, Leipzig).
- 12 Green C & Moran S (2014) Sandawe sound inventory (GM). *PHOIBLE Online*, eds Moran S, McCloy D, & Wright R (Max Planck Institute for Evolutionary Anthropology, Leipzig).
- 13 Database UPSI (2014) Sandawe sound inventory (UPSID). *PHOIBLE Online*, eds Moran S, McCloy D, & Wright R (Max Planck Institute for Evolutionary Anthropology, Leipzig).
- 14 Nurse D (1979) Description of 14 Bantu Languages of Tanzania. *African Languages*, London), Vol 5.1, pp 1-150.
- 15 Nurse D, and Gerard Philippson (1975) The Tanzanian language survey.
- 16 PHOIBLE (2014) Qimant sound inventory (PH). *PHOIBLE Online*, eds Moran S, McCloy D, & Wright R (Max Planck Institute for Evolutionary Anthropology, Leipzig).
- 17 Rendsburg (1997) Ancient Hebrew phonology. *Phonologies of Asia and Africa*, ed Kaye A (Winona Lake: Eisenbrauns), Vol 1, pp 65-83.
- 18 Wikipedia (2016) Levantine Arabic phonology. (Wikipedia, The Free Encyclopedia.).
- 19 Database UPSI (2014) Chuvash sound inventory (UPSID). *PHOIBLE Online*, eds Moran S, McCloy D, & Wright R (Max Planck Institute for Evolutionary Anthropology, Leipzig).
- 20 Archive SP (2014) Chuvash sound inventory (SPA). *PHOIBLE Online*, eds Moran S, McCloy D, & Wright R (Max Planck Institute for Evolutionary Anthropology, Leipzig).
- 21 Database UPSI (2014) Komi-Zyrian sound inventory (UPSID). *PHOIBLE Online*, eds Moran S, McCloy D, & Wright R (Max Planck Institute for Evolutionary Anthropology, Leipzig).
- 22 Archive SP (2014) Komi-Zyrian sound inventory (SPA). *PHOIBLE Online*, eds Moran S, McCloy D, & Wright R (Max Planck Institute for Evolutionary Anthropology, Leipzig).
- 23 Database UPSI (2014) Russian sound inventory (UPSID). *PHOIBLE Online*, eds Moran S, McCloy D, & Wright R (Max Planck Institute for Evolutionary Anthropology, Leipzig).
- 24 Archive SP (2014) Russian sound inventory (SPA). *PHOIBLE Online*, eds Moran S, McCloy D, & Wright R (Max Planck Institute for Evolutionary Anthropology, Leipzig).
- 25 Wikipedia (2016) Adyghe language. (Wikipedia, The Free Encyclopedia.).
- 26 Ferrer EB (2016) Sardinian language. (Wikipedia, The Free Encyclopedia.).
- 27 Archive SP (2014) Hungarian sound inventory (SPA). *PHOIBLE Online*, eds Moran S, McCloy D, & Wright R (Max Planck Institute for Evolutionary Anthropology, Leipzig).
- 28 Database UPSI (2014) Hungarian sound inventory (UPSID). *PHOIBLE Online*, eds Moran S, McCloy D, & Wright R (Max Planck Institute for Evolutionary Anthropology, Leipzig).
- 29 Archive SP (2014) Irish sound inventory (SPA). *PHOIBLE Online*, eds Moran S, McCloy D, & Wright R (Max Planck Institute for Evolutionary Anthropology, Leipzig).
- 30 Database UPSI (2014) Irish sound inventory (UPSID). *PHOIBLE Online*, eds Moran S, McCloy D, & Wright R (Max Planck Institute for Evolutionary Anthropology, Leipzig).

- 31 Wikipedia (2016) Danish phonology. (Wikipedia, The Free Encyclopedia.).
- 32 Archive SP (2014) Finnish sound inventory (SPA). *PHOIBLE Online*, eds Moran S, McCloy D, & Wright R (Max Planck Institute for Evolutionary Anthropology, Leipzig).
- 33 Database UPSI (2014) Finnish sound inventory (UPSID). *PHOIBLE Online*, eds Moran S, McCloy D, & Wright R (Max Planck Institute for Evolutionary Anthropology, Leipzig).
- 34 PHOIBLE (2014) Khanty sound inventory (PH). *PHOIBLE Online*, eds Moran S, McCloy D, & Wright R (Max Planck Institute for Evolutionary Anthropology, Leipzig).
- 35 Ramaswami N (2014) Malayalam sound inventory (RA). *PHOIBLE Online*, eds Moran S, McCloy D, & Wright R (Max Planck Institute for Evolutionary Anthropology, Leipzig).
- 36 Database UPSI (2014) Yakut sound inventory (UPSID). *PHOIBLE Online*, eds Moran S, McCloy D, & Wright R (Max Planck Institute for Evolutionary Anthropology, Leipzig).
- 37 Archive SP (2014) Yakut sound inventory (SPA). *PHOIBLE Online*, eds Moran S, McCloy D, & Wright R (Max Planck Institute for Evolutionary Anthropology, Leipzig).
- 38 Archive SP (2014) Central Khmer sound inventory (SPA). *PHOIBLE Online*, eds Moran S, McCloy D, & Wright R (Max Planck Institute for Evolutionary Anthropology, Leipzig).
- 39 Database UPSI (2014) Central Khmer sound inventory (UPSID). *PHOIBLE Online*, ed Moran S (Max Planck Institute for Evolutionary Anthropology, Leipzig).
- 40 PHOIBLE (2014) Lao sound inventory (PH). *PHOIBLE Online*, eds Moran S, McCloy D, & Wright R (Max Planck Institute for Evolutionary Anthropology, Leipzig).
- 41 Archive SP (2014) Nuclear Japanese sound inventory (SPA). *PHOIBLE Online*, eds Moran S, McCloy D, & Wright R (Max Planck Institute for Evolutionary Anthropology, Leipzig).
- 42 Database UPSI (2014) Nuclear Japanese sound inventory (UPSID). *PHOIBLE Online*, eds Moran S, McCloy D, & Wright R (Max Planck Institute for Evolutionary Anthropology, Leipzig).
- 43 Archive SP (2014) Korean sound inventory (SPA). *PHOIBLE Online*, eds Moran S, McCloy D, & Wright R (Max Planck Institute for Evolutionary Anthropology, Leipzig).
- 44 Archive SP (2014) Yue Chinese sound inventory (SPA). *PHOIBLE Online*, eds Moran S, McCloy D, & Wright R (Max Planck Institute for Evolutionary Anthropology, Leipzig).
- 45 Database UPSI (2014) Yue Chinese sound inventory (UPSID). *PHOIBLE Online*, eds Moran S, McCloy D, & Wright R (Max Planck Institute for Evolutionary Anthropology, Leipzig).
- 46 Database UPSI (2014) Min Nan Chinese sound inventory (UPSID). *PHOIBLE Online*, eds Moran S, McCloy D, & Wright R (Max Planck Institute for Evolutionary Anthropology, Leipzig).
- 47 Archive SP (2014) Hakka Chinese sound inventory (SPA). *PHOIBLE Online*, eds Moran S, McCloy D, & Wright R (Max Planck Institute for Evolutionary Anthropology, Leipzig).
- 48 Database UPSI (2014) Hakka Chinese sound inventory (UPSID). *PHOIBLE Online*, eds Moran S, McCloy D, & Wright R (Max Planck Institute for Evolutionary Anthropology, Leipzig).

- 49 Database UPSI (2014) Atayal sound inventory (UPSID). *PHOIBLE Online*, eds Moran S, McCloy D, & Wright R (Max Planck Institute for Evolutionary Anthropology, Leipzig).
- 50 Maddieson I & Wright R (1995) The vowels and consonants of Amis — a preliminary phonetic report. *Fieldwork Studies of Targeted Languages III*, (UCLA Working Papers in Phonetics, Los Angeles), Vol 91, pp 45–65.
- 51 Wikipedia (2016) Nauruan language (Wikipedia, The Free Encyclopedia).
- 52 Database UPSI (2014) Naasioi sound inventory (UPSID). *PHOIBLE Online*, eds Moran S, McCloy D, & Wright R (Max Planck Institute for Evolutionary Anthropology, Leipzig).
- 53 Archive SP (2014) Naasioi sound inventory (SPA). *PHOIBLE Online*, eds Moran S, McCloy D, & Wright R (Max Planck Institute for Evolutionary Anthropology, Leipzig).
- 54 Wikipedia (2016) (2016) Cheyenne language. (Wikipedia, The Free Encyclopedia.).
- 55 Archive SP (2014) Tohono O’odham sound inventory (SPA). *PHOIBLE Online*, eds Moran S, McCloy D, & Wright R (Max Planck Institute for Evolutionary Anthropology, Leipzig).
- 56 Database UPSI (2014) Tohono O’odham sound inventory (UPSID). *PHOIBLE Online*, eds Moran S, McCloy D, & Wright R (Max Planck Institute for Evolutionary Anthropology, Leipzig).
- 57 Materials BCoU (2015) Pima Bajo Phonetic Notes. (SIL International, Mexico).
- 58 Database UPSI (2014) Yucateco sound inventory (UPSID). *PHOIBLE Online*, eds Moran S, McCloy D, & Wright R (Max Planck Institute for Evolutionary Anthropology, Leipzig).
- 59 Database SAPI (2014) Cusco Quechua sound inventory (SAPHON). *PHOIBLE Online*, ed Moran S (Max Planck Institute for Evolutionary Anthropology, Leipzig).
- 60 Archive SP (2014) Ticuna sound inventory (SPA). *PHOIBLE Online*, eds Moran S, McCloy D, & Wright R (Max Planck Institute for Evolutionary Anthropology, Leipzig).
- 61 Database. SAPI (2014) Ticuna sound inventory (SAPHON). *PHOIBLE Online*, ed Moran S (Max Planck Institute for Evolutionary Anthropology, Leipzig).
- 62 Database UPSI (2014) Ticuna sound inventory (UPSID). *PHOIBLE Online*, eds Moran S, McCloy D, & Wright R (Max Planck Institute for Evolutionary Anthropology, Leipzig).
- 63 Database SAPI (2014) Surui sound inventory (SAPHON). *PHOIBLE Online*, eds Moran S, McCloy D, & Wright R (Max Planck Institute for Evolutionary Anthropology, Leipzig).
- 64 PHOIBLE (2014) Karitiana sound inventory (PH). *PHOIBLE Online*, eds Moran S, McCloy D, & Wright R (Max Planck Institute for Evolutionary Anthropology, Leipzig).

**Supplementary Table S4.** SNPs used for calculating tau scores. Listed are the 165 SNPs genotyped on the 43 populations studied.

| SNP        | Alleles | SNP       | Alleles | SNP       | Alleles | SNP       | Alleles | SNP       | Alleles |
|------------|---------|-----------|---------|-----------|---------|-----------|---------|-----------|---------|
| rs10007810 | AG      | rs1800414 | TC      | rs2986742 | CT      | rs4951629 | CT      | rs9171115 | CT      |
| rs10108270 | AC      | rs1834619 | AG      | rs310644  | CT      | rs4955316 | GT      | rs9291090 | AC      |
| rs10236187 | AC      | rs1837606 | CT      | rs3118378 | AG      | rs4984913 | AG      | rs9319336 | CT      |
| rs1040045  | AG      | rs1871428 | AG      | rs316598  | CT      | rs5768007 | CT      | rs946918  | GT      |
| rs1040404  | AG      | rs1871534 | CG      | rs316873  | CT      | rs6104567 | GT      | rs948028  | AC      |
| rs10496971 | GT      | rs1876482 | AG      | rs32314   | CT      | rs6422347 | CT      | rs9522149 | CT      |
| rs10497191 | CT      | rs1879488 | AC      | rs37369   | TC      | rs6451722 | AG      | rs9530435 | CT      |
| rs10510228 | AG      | rs192655  | AG      | rs3737576 | CT      | rs6464211 | CT      | rs9809104 | CT      |
| rs10511828 | CT      | rs1950993 | GT      | rs3745099 | AG      | rs647325  | AG      | rs9845457 | AG      |
| rs10512572 | AG      | rs2001907 | CT      | rs3784230 | AG      | rs6541030 | AG      |           |         |
| rs10513300 | CT      | rs200354  | GT      | rs3793451 | CT      | rs6548616 | CT      |           |         |
| rs10839880 | CT      | rs2024566 | AG      | rs3793791 | CT      | rs6556352 | CT      |           |         |
| rs10954737 | CT      | rs2030763 | AG      | rs3811801 | AG      | rs671     | AG      |           |         |
| rs11227699 | AG      | rs2033111 | AG      | rs3814134 | AG      | rs6754311 | CT      |           |         |
| rs11652805 | CT      | rs2042762 | CT      | rs3823159 | AG      | rs6990312 | GT      |           |         |
| rs12130799 | AG      | rs2070586 | AG      | rs3827760 | AG      | rs705308  | AC      |           |         |
| rs12439433 | AG      | rs2073821 | CT      | rs385194  | AG      | rs7226659 | GT      |           |         |
| rs12498138 | AG      | rs2125345 | CT      | rs3907047 | CT      | rs7238445 | AG      |           |         |
| rs12544346 | AG      | rs214678  | CT      | rs3916235 | CT      | rs7251928 | AC      |           |         |
| rs12629908 | AG      | rs2166624 | AG      | rs3943253 | AG      | rs731257  | AG      |           |         |
| rs12657828 | AG      | rs2196051 | AG      | rs4411548 | CT      | rs7326934 | CG      |           |         |
| rs12913832 | AG      | rs2238151 | AG      | rs4458655 | CT      | rs734873  | AG      |           |         |
| rs1296819  | AC      | rs2269793 | GT      | rs4463276 | AG      | rs735480  | CT      |           |         |
| rs1325502  | AG      | rs2306040 | CT      | rs4471745 | AG      | rs7421394 | AG      |           |         |
| rs13400937 | GT      | rs2330442 | AG      | rs459920  | CT      | rs7554936 | CT      |           |         |

|            |    |           |    |           |    |           |    |
|------------|----|-----------|----|-----------|----|-----------|----|
| rs1407434  | AG | rs2357442 | AC | rs4666200 | AG | rs7657799 | GT |
| rs1426654  | AG | rs2397060 | CT | rs4670767 | GT | rs7722456 | CT |
| rs1462906  | CT | rs2416791 | AG | rs4717865 | AG | rs772262  | AG |
| rs1471939  | CT | rs2504853 | CT | rs4746136 | AG | rs7745461 | AG |
| rs1500127  | CT | rs2532060 | CT | rs4781011 | GT | rs7803075 | AG |
| rs1513056  | AG | rs2593595 | AG | rs4798812 | AG | rs7844723 | CT |
| rs1513181  | AG | rs260690  | AC | rs4800105 | CT | rs798443  | AG |
| rs1569175  | CT | rs2627037 | AG | rs4821004 | CT | rs7997709 | CT |
| rs1572018  | CT | rs2702414 | AG | rs4833103 | CA | rs8021730 | GT |
| rs16891982 | CG | rs2814778 | CT | rs4880436 | TC | rs8035124 | AC |
| rs1693425  | TC | rs2835370 | CT | rs4891825 | AG | rs8113143 | AC |
| rs174570   | CT | rs2899826 | AG | rs4908343 | AG | rs818386  | CT |
| rs1760921  | CT | rs2946788 | GT | rs4918664 | AG | rs874299  | CT |
| rs17642714 | AT | rs2966849 | AG | rs4918842 | CT | rs881728  | AC |



**Supplementary Table S5.** Jackknife sensitivity analyses. Leave-one out and leave-n out jackknifing, respectively, under both the MANCOVA and linear mixed effects models. Jackknife samples ordered by Incremental R2 in association between RU1-1 and consonants. Incremental R2 (Inc R2) is the change in adjusted R2 from the model fits over the full model and the null model where RU1-1 has no effect.

| Sample                    | MANCOVA model |        |       |        |        |       | Linear mixed effects model |         |                      |
|---------------------------|---------------|--------|-------|--------|--------|-------|----------------------------|---------|----------------------|
|                           | Consonants    |        |       | Vowels |        |       | Slopes                     |         | Log-likelihood ratio |
|                           | Beta          | Inc R2 | P     | Beta   | Inc R2 | P     | Consonants                 | Vowels  | Jackknife/Full       |
| <b>Full sample (n=43)</b> | 1.75          | 0.14   | 0.003 | -0.61  | -0.01  | 0.471 | 0.0020                     | -0.0023 | -                    |
| <b>Removed population</b> |               |        |       |        |        |       |                            |         |                      |
| Nasioi Melanesians        | 1.35          | 0.09   | 0.013 | -0.71  | -0.01  | 0.424 | 0.0019                     | -0.0023 | 0.97                 |
| Sandawe                   | 1.50          | 0.09   | 0.015 | -0.87  | 0.00   | 0.340 | 0.0016                     | -0.0023 | 0.98                 |
| Adygei                    | 1.58          | 0.10   | 0.011 | -0.25  | -0.03  | 0.774 | 0.0017                     | -0.0019 | 0.97                 |
| Finns                     | 1.67          | 0.12   | 0.005 | -0.54  | -0.02  | 0.531 | 0.0020                     | -0.0023 | 0.96                 |
| Danes                     | 1.67          | 0.13   | 0.004 | -0.49  | -0.02  | 0.554 | 0.0022                     | -0.0027 | 0.97                 |
| Zaramo                    | 1.71          | 0.13   | 0.004 | -0.75  | -0.01  | 0.380 | 0.0019                     | -0.0024 | 0.97                 |
| Ibo                       | 1.67          | 0.13   | 0.004 | -0.75  | -0.01  | 0.374 | 0.0019                     | -0.0024 | 0.96                 |
| Chagga                    | 1.72          | 0.13   | 0.004 | -0.75  | -0.01  | 0.381 | 0.0019                     | -0.0024 | 0.97                 |
| Yoruba                    | 1.70          | 0.13   | 0.004 | -0.53  | -0.02  | 0.530 | 0.0020                     | -0.0023 | 0.96                 |
| Rondonian Surui           | 1.70          | 0.13   | 0.004 | -0.62  | -0.01  | 0.472 | 0.0020                     | -0.0023 | 0.96                 |
| Khanty                    | 1.71          | 0.13   | 0.004 | -0.52  | -0.02  | 0.541 | 0.0020                     | -0.0023 | 0.96                 |
| Chuvash                   | 1.74          | 0.13   | 0.004 | -0.59  | -0.01  | 0.493 | 0.0019                     | -0.0023 | 0.96                 |
| Keralites                 | 1.73          | 0.13   | 0.004 | -0.66  | -0.01  | 0.441 | 0.0020                     | -0.0023 | 0.97                 |
| Russian, Archangel'sk     | 1.74          | 0.14   | 0.004 | -0.50  | -0.02  | 0.560 | 0.0020                     | -0.0022 | 0.96                 |
| Micronesians              | 1.77          | 0.14   | 0.003 | -0.57  | -0.02  | 0.511 | 0.0020                     | -0.0023 | 0.97                 |
| Koreans                   | 1.75          | 0.14   | 0.003 | -0.65  | -0.01  | 0.440 | 0.0020                     | -0.0024 | 0.96                 |
| Russian, Vologda          | 1.74          | 0.14   | 0.004 | -0.53  | -0.02  | 0.527 | 0.0020                     | -0.0023 | 0.96                 |
| Druze                     | 1.75          | 0.14   | 0.003 | -0.61  | -0.01  | 0.475 | 0.0021                     | -0.0022 | 0.96                 |
| Yakut                     | 1.75          | 0.14   | 0.003 | -0.62  | -0.01  | 0.460 | 0.0020                     | -0.0023 | 0.96                 |
| Hakka                     | 1.75          | 0.14   | 0.003 | -0.66  | -0.01  | 0.438 | 0.0020                     | -0.0024 | 0.96                 |
| Ethiopian Jews            | 1.76          | 0.14   | 0.003 | -0.60  | -0.01  | 0.489 | 0.0020                     | -0.0023 | 0.97                 |

|                       |      |      |       |       |       |       |        |         |      |
|-----------------------|------|------|-------|-------|-------|-------|--------|---------|------|
| Chinese, S.F.         | 1.76 | 0.14 | 0.003 | -0.62 | -0.01 | 0.467 | 0.0020 | -0.0023 | 0.96 |
| Ashkenazi Jews        | 1.76 | 0.14 | 0.003 | -0.59 | -0.01 | 0.483 | 0.0020 | -0.0023 | 0.96 |
| Cambodians            | 1.77 | 0.14 | 0.003 | -0.49 | -0.02 | 0.549 | 0.0020 | -0.0023 | 0.97 |
| Atayal                | 1.77 | 0.14 | 0.003 | -0.64 | -0.01 | 0.453 | 0.0020 | -0.0024 | 0.97 |
| Ami                   | 1.76 | 0.14 | 0.003 | -0.59 | -0.01 | 0.469 | 0.0020 | -0.0023 | 0.96 |
| Chinese, Taiwan       | 1.77 | 0.14 | 0.003 | -0.56 | -0.02 | 0.509 | 0.0020 | -0.0022 | 0.96 |
| Komi                  | 1.78 | 0.14 | 0.003 | -0.65 | -0.01 | 0.450 | 0.0020 | -0.0024 | 0.97 |
| Roman Jew             | 1.78 | 0.14 | 0.003 | -0.54 | -0.02 | 0.526 | 0.0020 | -0.0022 | 0.97 |
| Maya                  | 1.78 | 0.14 | 0.003 | -0.61 | -0.01 | 0.477 | 0.0020 | -0.0023 | 0.96 |
| Karitiana             | 1.72 | 0.14 | 0.004 | -0.49 | -0.02 | 0.549 | 0.0020 | -0.0023 | 0.96 |
| Ticuna                | 1.83 | 0.14 | 0.003 | -0.85 | 0.00  | 0.325 | 0.0020 | -0.0026 | 0.99 |
| Hausa                 | 1.78 | 0.15 | 0.002 | -0.60 | -0.01 | 0.480 | 0.0020 | -0.0023 | 0.97 |
| Pima, Mexico          | 1.82 | 0.15 | 0.003 | -0.56 | -0.02 | 0.519 | 0.0020 | -0.0021 | 0.97 |
| Pima, Arizona         | 1.82 | 0.15 | 0.002 | -0.62 | -0.01 | 0.469 | 0.0021 | -0.0024 | 0.97 |
| Hungarians            | 1.82 | 0.15 | 0.002 | -0.53 | -0.02 | 0.532 | 0.0021 | -0.0022 | 0.97 |
| Laotians              | 1.85 | 0.15 | 0.002 | -0.52 | -0.02 | 0.537 | 0.0022 | -0.0019 | 0.98 |
| Japanese              | 1.95 | 0.15 | 0.002 | -0.60 | -0.02 | 0.506 | 0.0020 | -0.0021 | 1.00 |
| Irish                 | 1.81 | 0.15 | 0.002 | -0.49 | -0.02 | 0.550 | 0.0021 | -0.0018 | 0.96 |
| Yemenite Jews         | 1.99 | 0.16 | 0.002 | -0.47 | -0.02 | 0.601 | 0.0020 | -0.0020 | 1.00 |
| Cheyenne              | 1.77 | 0.16 | 0.002 | -0.59 | -0.01 | 0.469 | 0.0020 | -0.0023 | 0.96 |
| Quechua               | 1.89 | 0.16 | 0.001 | -0.77 | 0.00  | 0.359 | 0.0021 | -0.0025 | 0.98 |
| Sardinian             | 2.00 | 0.16 | 0.001 | -1.03 | 0.01  | 0.244 | 0.0020 | -0.0027 | 1.00 |
| <b>Removed region</b> |      |      |       |       |       |       |        |         |      |
| Africa (n=7)          | 1.22 | 0.05 | 0.056 | -1.31 | 0.03  | 0.182 | 0.0014 | -0.0024 | 0.78 |
| Americas (n=8)        | 1.47 | 0.10 | 0.012 | -1.22 | 0.02  | 0.203 | 0.0020 | -0.0025 | 0.80 |
| EastAsia (n=16)       | 1.66 | 0.12 | 0.015 | -0.51 | -0.03 | 0.599 | 0.0021 | -0.0021 | 0.63 |
| Europe (n=12)         | 1.90 | 0.13 | 0.030 | 0.47  | -0.04 | 0.694 | 0.0021 | -0.0013 | 0.52 |

**Supplementary Table S6.** RU1-1 Univariate regression using a quadratic term.

| <b>Model</b>    | <b>R2</b> | <b>p-value</b> | <b>AIC</b> | <b>Significance (p-value) in ANOVA vs 3 PCs Model</b> |
|-----------------|-----------|----------------|------------|-------------------------------------------------------|
| 3 PCs           | 0.3       | 0.001207       | -51.61     | N/A                                                   |
| Linear RU1-1    | 0.4       | $5.275e^{-05}$ | -55.19     | 0.0028                                                |
| Quadratic RU1-1 | 0.5       | $8.015e^{-06}$ | -60.67     | 0.0005                                                |
